# Supplementary material
Source: publisher figshare collection journal article supplement (https://tandf.figshare.com/articles/dataset/_/12851295)
Supplement: Supplementary file 1 [file 2]

Archive with 29 entries (29 files):
- 24696525_.DS_Store
- 24696528_.DS_Store
- 24696531_.DS_Store
- 24696534_.DS_Store
- 24696537_.DS_Store
- 24696540_.DS_Store
- 24696543_.Rhistory
- 24696546_.Rhistory
- 24696549_.Rhistory
- 24696552_README.md
- 24696555_README.md
- analysis_wholeUS.R
- create_dataset.R
- 24696564_exmatch_trt_v2.R
- 24696567_exmatch_trt_v2.R
- figure_2.R
- figure_2_verify.pdf
- 24696576_match_rn_app_v2.R
- 24696579_match_rn_app_v2.R
- 24696582_match_rn_boot6.R
- 24696585_match_rn_boot6.R
- 24696588_mdmatch_conf_v2.R
- 24696591_mdmatch_conf_v2.R
- realdata_master.R
- simulation_master.R
- supplement.pdf
- table_2.R
- table_2_verify.txt
- uasa_a_1803883_sm4173.pdf
