# Supplementary material
Source: publisher figshare collection journal article supplement (https://tandf.figshare.com/articles/dataset/_/12851295)
Supplement: Supplementary file 1 [file 2 › 24696552_README.md]

This directory contains supplementary materials for the paper "Evaluation of the health impacts of the 1990 Clean Air Act Amendments using causal inference and machine learning". Its contents are:

1. A folder called "code" that contains the R code to reproduce the simulations and real data analyses from the paper
2. A file called "supplement.pdf" that contains additional details about the data, methods, and results described in the paper
