# Supplementary material
Source: publisher figshare collection journal article supplement (https://tandf.figshare.com/articles/dataset/_/12851295)

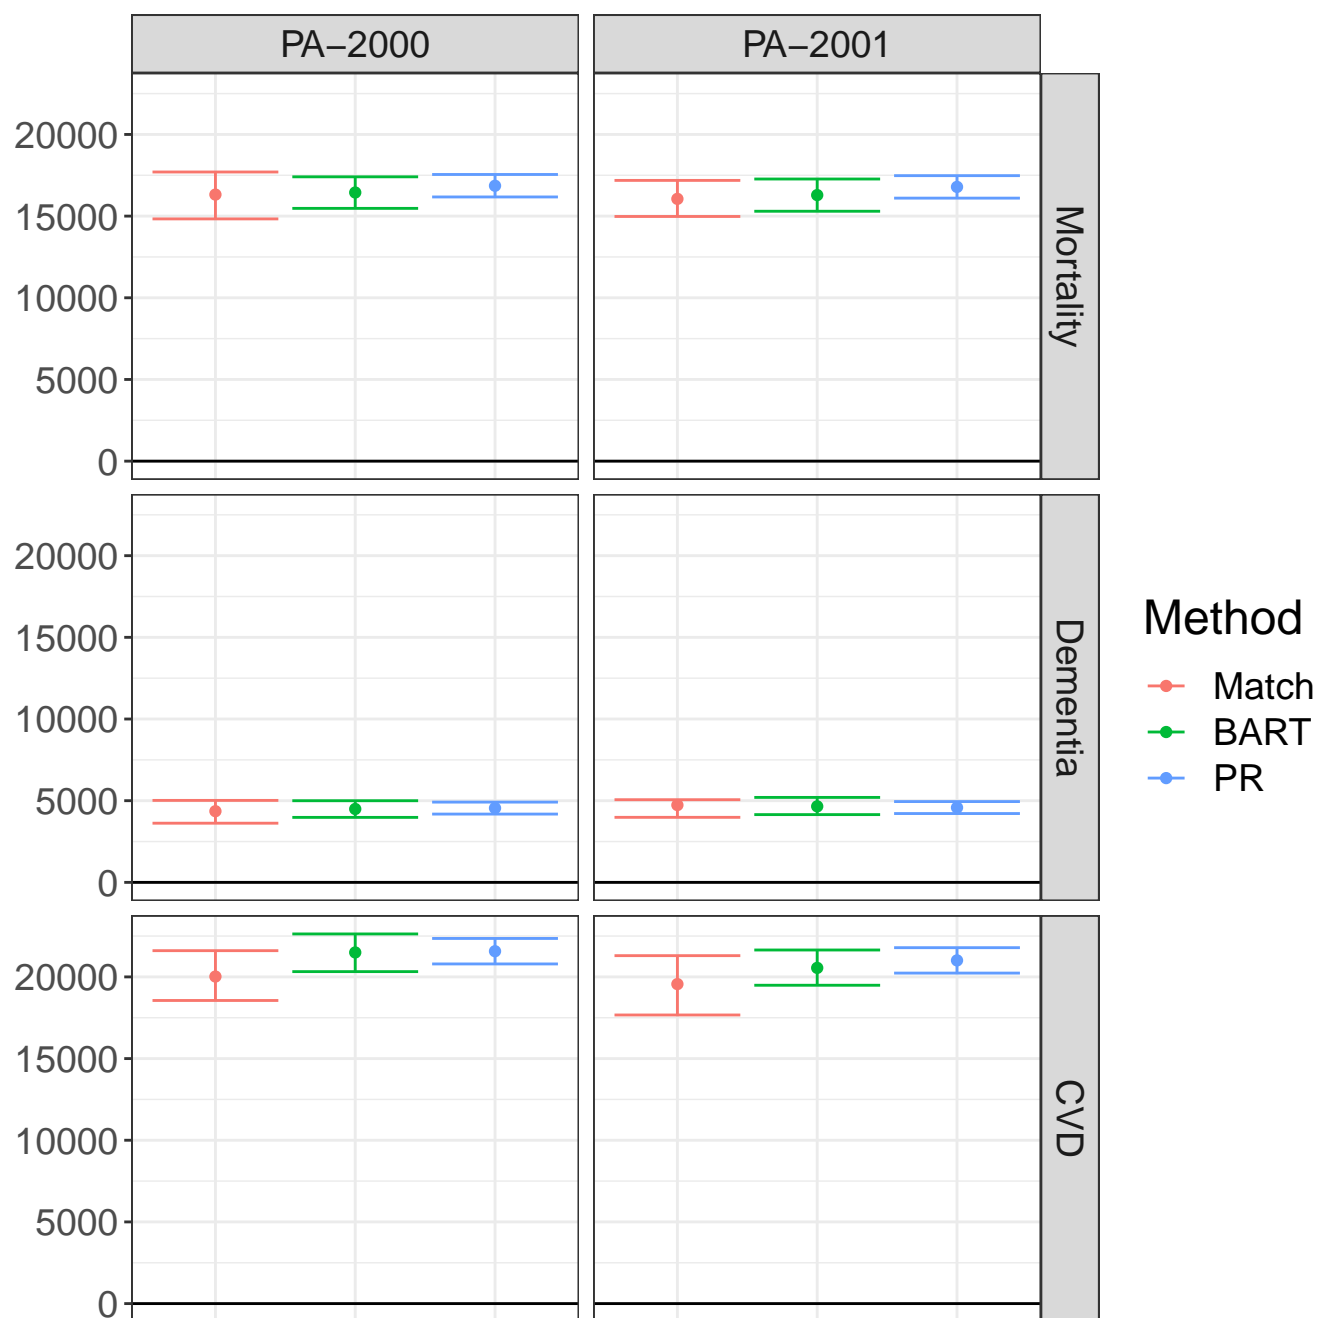

Supplement: Supplementary file 1 [file 2 › figure_2_verify.pdf]
